# Supplementary material for: Bradykinin Protects Human Endothelial Progenitor Cells from High-Glucose-Induced Senescence through B2 Receptor-Mediated Activation of the Akt/eNOS Signalling Pathway
Source: J Diabetes Res. 2021 Sep 11;2021:6626627. doi: 10.1155/2021/6626627 (PMC8452971; doi:10.1155/2021/6626627)
Supplement: Supplementary 1 — Figure S1: EPCs were stained for uptake of Dil-Ac-LDL or for lectin binding. [file 6626627.f1.pdf]

Initial colonies appearance

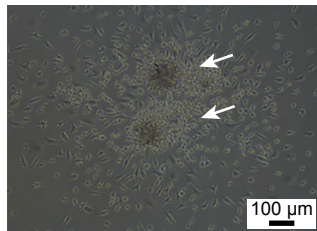

Colony

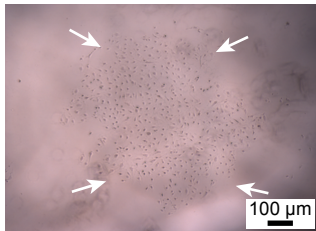

Thread-like structure

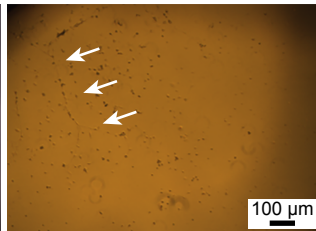

Cobblestone-like morphology

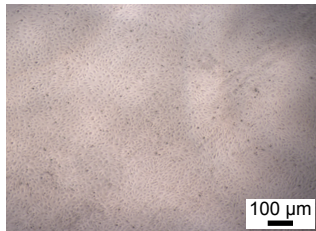

(a)

DAPI

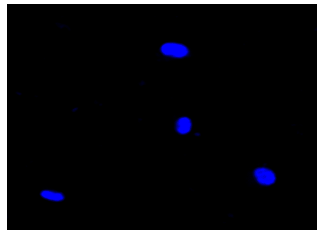

Lectin

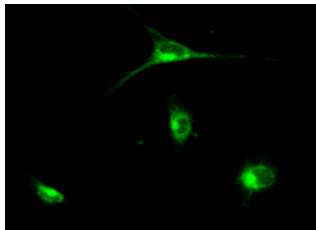

acLDL-Dil

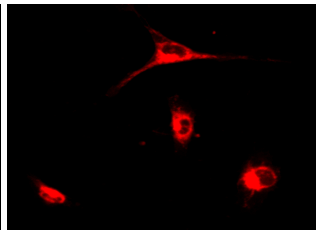

Merge

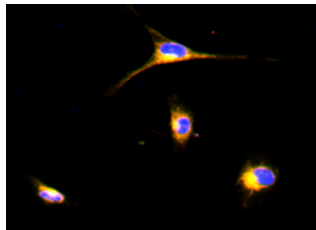

(b)
